# Supplementary material for: Pupil Sizes Scale with Attentional Load and Task Experience in a Multiple Object Tracking Task
Source: PubMed Central journal article supplement (PMC5157994; doi:10.1371/journal.pone.0168087), 2016-12-15
Supplement: pone.0168087.s003.pdf [file pone.0168087.s003.pdf]

The raw MOT task performance and Eyetracking data can be accessed in the following repository: [osf.io/qtzjb](https://osf.io/qtzjb)
